# Supplementary material for: Using Integrative Behavior Model to Predict COVID-19 Vaccination Intention among Health Care Workers in Indonesia: A Nationwide Survey
Source: Vaccines (Basel). 2022 May 4;10(5):719. doi: 10.3390/vaccines10050719 (PMC9145718; doi:10.3390/vaccines10050719)
Supplement: Supplementary file 1 [file vaccines-10-00719-s001.zip › Supplementary_Table S1.pdf]

Table S1. Final regression model with additional data.

| Variables                                          | COVID-19<br>vaccination<br>intention<br>(DV) | Behavior<br>belief | Experiential<br>attitude | Perceived<br>norm | Self-<br>efficacy | Perceived<br>control | Sex<br>(female) | Province<br>(provinces<br>in Java<br>Island) | Income<br>(high<br>income) | Marital<br>status<br>(married) | Persona<br>l history<br>of<br>COVID-<br>19<br>infectio<br>n (yes) | Job<br>(Clinical<br>-related<br>jobs) | B       | SE B                    | β      | R     | R <sup>2</sup> | sr <sup>2</sup> |
|----------------------------------------------------|----------------------------------------------|--------------------|--------------------------|-------------------|-------------------|----------------------|-----------------|----------------------------------------------|----------------------------|--------------------------------|-------------------------------------------------------------------|---------------------------------------|---------|-------------------------|--------|-------|----------------|-----------------|
| Model 1                                            |                                              |                    |                          |                   |                   |                      |                 |                                              |                            |                                |                                                                   |                                       |         |                         |        | 0.64  | 0.409          | 0.41            |
| Behavior belief                                    | .599**                                       |                    |                          |                   |                   |                      |                 |                                              |                            |                                |                                                                   |                                       | 0.007*  | 2.96 x 10 <sup>-4</sup> | 0.413  |       |                |                 |
| Experiential attitude                              | -.213**                                      | -.287**            |                          |                   |                   |                      |                 |                                              |                            |                                |                                                                   |                                       | -0.002* | 3.92 x 10 <sup>-4</sup> | -0.091 |       |                |                 |
| Perceived norm                                     | .474**                                       | .569**             | -.114**                  |                   |                   |                      |                 |                                              |                            |                                |                                                                   |                                       | 0.002*  | 2.2 x 10 <sup>-4</sup>  | 0.153  |       |                |                 |
| Self-efficacy                                      | .431**                                       | .482**             | -.071**                  | .446**            |                   |                      |                 |                                              |                            |                                |                                                                   |                                       | 0.005*  | 0.001                   | 0.145  |       |                |                 |
| Perceived control                                  | .109**                                       | .037**             | .308**                   | .145**            | .153**            |                      |                 |                                              |                            |                                |                                                                   |                                       | 0.002*  | 4.26 x 10 <sup>-4</sup> | 0.077  |       |                |                 |
| Model 2                                            |                                              |                    |                          |                   |                   |                      |                 |                                              |                            |                                |                                                                   |                                       |         |                         |        | 0.654 | 0.425          | 0.017           |
| Behavior belief                                    | .599**                                       |                    |                          |                   |                   |                      |                 |                                              |                            |                                |                                                                   |                                       | 0.007*  | 2.98 x 10 <sup>-4</sup> | 0.412  |       |                |                 |
| Experiential attitude                              | -.213**                                      | -.287**            |                          |                   |                   |                      |                 |                                              |                            |                                |                                                                   |                                       | -0.002* | 3.92 x 10 <sup>-4</sup> | -0.076 |       |                |                 |
| Perceived norm                                     | .474**                                       | .569**             | -.114**                  |                   |                   |                      |                 |                                              |                            |                                |                                                                   |                                       | 0.002*  | 2.19 x 10 <sup>-4</sup> | 0.162  |       |                |                 |
| Self-efficacy                                      | .431**                                       | .482**             | -.071**                  | .446**            |                   |                      |                 |                                              |                            |                                |                                                                   |                                       | 0.005*  | 0.001                   | 0.143  |       |                |                 |
| Perceived control                                  | .109**                                       | .037**             | .308**                   | .145**            | .153**            |                      |                 |                                              |                            |                                |                                                                   |                                       | 0.002*  | 4.25 x 10 <sup>-4</sup> | 0.072  |       |                |                 |
| Sex (female)                                       | -.100**                                      | -.063**            | .057**                   | -.027             | .02               | -.087**              |                 |                                              |                            |                                |                                                                   |                                       | -0.161* | 0.032                   | -0.068 |       |                |                 |
| Province (provinces<br>in Java Island)             | .064**                                       | -.005              | .006                     | -.035**           | -.013             | -.003                | .044**          |                                              |                            |                                |                                                                   |                                       | 0.166*  | 0.030                   | 0.074  |       |                |                 |
| Income (high income)                               | .148**                                       | .177**             | -.202**                  | .016              | .121**            | -.08**               | -.17**          | .107**                                       |                            |                                |                                                                   |                                       | 0.089*  | 0.035                   | 0.038  |       |                |                 |
| Marital status<br>(married)                        | .033                                         | .117**             | -.01                     | .068**            | .068**            | -.036**              | -.112**         | -.005                                        | .132**                     |                                |                                                                   |                                       | -0.097* | 0.038                   | -0.037 |       |                |                 |
| Personal history of<br>COVID-19 infection<br>(yes) | -.065**                                      | .013               | .049**                   | -.012             | -.034**           | .073**               | -.03**          | -.006                                        | .01                        | .008**                         |                                                                   |                                       | -0.282* | 0.056                   | -0.067 |       |                |                 |
| Job (clinical-related<br>jobs)                     | .064**                                       | .098**             | -.079**                  | -.013             | .067**            | -.023                | -.012           | .061**                                       | .223**                     | .11**                          | .029**                                                            |                                       | 0.018   | 0.035                   | 0.007  |       |                |                 |
| Age                                                | .105**                                       | .196**             | -.097**                  | .105**            | .079**            | -0.39**              | -.144**         | .079**                                       | .361**                     | .378**                         | .009                                                              | .132**                                | -0.003  | 0.002                   | -0.027 |       |                |                 |

\*p < 0.01.

\*\*p < 0.05.
