# Supplementary material for: Using Integrative Behavior Model to Predict COVID-19 Vaccination Intention among Health Care Workers in Indonesia: A Nationwide Survey
Source: Vaccines (Basel). 2022 May 4;10(5):719. doi: 10.3390/vaccines10050719 (PMC9145718; doi:10.3390/vaccines10050719)
Supplement: Supplementary file 1 [file vaccines-10-00719-s001.zip › Supplementary_Table S2.pdf]

**Table S2.** List of symbols.

| Symbol          | Description                                |
|-----------------|--------------------------------------------|
| p               | P value                                    |
| R               | Coefficient of multiple correlation        |
| R <sup>2</sup>  | Coefficient of determination               |
| B               | Unstandardized regression coefficients     |
| SE B            | Standard error for the unstandardized beta |
| β               | Standardized regression coefficients       |
| sr <sup>2</sup> | Squared semipartial correlations           |
| F               | F-ratio                                    |
